# Supplementary material for: Efficacy and Safety of Dapagliflozin in Patients With Inadequately Controlled Type 1 Diabetes (the DEPICT-2 Study): 24-Week Results From a Randomized Controlled Trial
Source: Oxford University Press journal article supplement (doi:10.2337/dc18-0623), 2018-07-19
Supplement: dc180623supplementarydata.pdf [file dc180623supplementarydata.pdf]

## SUPPLEMENTARY DATA

### List of supplementary material

1. Supplementary Table 1. Complete list of inclusion and exclusion criteria
2. Supplementary Table 2. Additional details about study methodology
3. Supplementary Table 3. Sensitivity analysis using multiple imputation for patients discontinuing treatment early
4. Supplementary Table 4. Change in HbA1c (%) from baseline to Week 24 (evaluation in subgroups by use of personal CGM)
5. Supplementary Table 5. Change in HbA1c (%) from baseline to Week 24 (evaluation in subgroups by method of insulin administration)
6. Supplementary Table 6. Change in CGM mean glucose values and MAGE
7. Supplementary Table 7. Summary of recurrent hypoglycemic events
8. Supplementary Table 8. Number of self-monitored blood ketone measurements
9. Supplementary Table 9. Listing of maximum ketone values for patients with definite DKA events
10. Supplementary Figure 1. Absolute mean (SD) HbA1c (%) over 24 weeks
11. Supplementary Appendix. List of DEPICT-2 Principal Investigators

**Supplementary Table 1. Complete list of inclusion and exclusion criteria**

| <b>Inclusion criteria</b> |                                                                                                                                                                                                                                                                                                                                                                                                                                                                                                                                                                                                          |
|---------------------------|----------------------------------------------------------------------------------------------------------------------------------------------------------------------------------------------------------------------------------------------------------------------------------------------------------------------------------------------------------------------------------------------------------------------------------------------------------------------------------------------------------------------------------------------------------------------------------------------------------|
| 1.                        | Provision of written informed consent                                                                                                                                                                                                                                                                                                                                                                                                                                                                                                                                                                    |
| 2.                        | Men and women of age 18–75 years                                                                                                                                                                                                                                                                                                                                                                                                                                                                                                                                                                         |
| 3.                        | Diagnosis of type 1 diabetes and central laboratory test of C-peptide <0.7 ng/mL (or <0.23 nmol/L)                                                                                                                                                                                                                                                                                                                                                                                                                                                                                                       |
| 4.                        | Insulin usage for ≥12 months, and <ol style="list-style-type: none"> <li>1. No change in method of insulin administration method (MDI or CSII) for ≥3 months prior to the screening visit</li> <li>2. Patients must be on a total insulin dose of ≥0.3 U/kg/day for ≥3 months prior to the screening visit</li> <li>3. If on MDI insulin administration, patients must be receiving ≥3 injections/day</li> </ol>                                                                                                                                                                                         |
| 5.                        | HbA1c between 7.7% and 11.0% at screening visit, and 7.5% and 10.5% at the Week-1 visit*                                                                                                                                                                                                                                                                                                                                                                                                                                                                                                                 |
| 6.                        | BMI ≥18.5 kg/m <sup>2</sup>                                                                                                                                                                                                                                                                                                                                                                                                                                                                                                                                                                              |
| 7.                        | Women of childbearing potential must have a negative serum or urine pregnancy test <sup>†</sup> in 24 hours prior to the start of the study treatment                                                                                                                                                                                                                                                                                                                                                                                                                                                    |
| 8.                        | Men and non-postmenopausal women must have agreed to the use of highly effective contraception                                                                                                                                                                                                                                                                                                                                                                                                                                                                                                           |
| <b>Exclusion criteria</b> |                                                                                                                                                                                                                                                                                                                                                                                                                                                                                                                                                                                                          |
| <b>Medical history</b>    |                                                                                                                                                                                                                                                                                                                                                                                                                                                                                                                                                                                                          |
| 1.                        | Type 2 diabetes                                                                                                                                                                                                                                                                                                                                                                                                                                                                                                                                                                                          |
| 2.                        | History of <ol style="list-style-type: none"> <li>a) Maturity onset diabetes of young, pancreatic surgery or chronic pancreatitis or other pancreatic disorders that could result in decreased β-cell capacity (i.e., pancreatogenous diabetes)</li> <li>b) DKA requiring medical intervention (i.e., emergency room visit and/or hospitalization) within 1 month prior to the screening visit</li> <li>c) Hospital admission for glycemic control (hyperglycemia or hypoglycemia) within 1 month prior to the screening visit</li> <li>d) Addison’s disease or chronic adrenal insufficiency</li> </ol> |

## SUPPLEMENTARY DATA

- e) Diabetes insipidus
  - f) Bariatric surgery or lap-band procedure within 12 months prior to screening
3. Frequent episodes of severe hypoglycemia<sup>‡</sup>
  4. Symptoms of poorly controlled diabetes including but not limited to marked polyuria and polydipsia with greater than 10% weight loss during 3 months prior to the screening visit, or other signs and symptoms of poor glycemic control
  5. Patients currently abusing alcohol or other drugs or who had done so in the 6 months prior to the Day-1 visit

---

### Prohibited medications

1. Previous use of dapagliflozin and/or any other SGLT2 inhibitors
2. Use of any daily GLP-1 receptor agonist for  $\geq 1$  month or weekly GLP-1 receptor agonist for  $\geq 2$  months prior to the screening visit
3. Use of insulin-sensitizing agents, such as metformin and/or thiazolidinediones, within 2 months prior to the screening visit
4. Replacement or chronic systemic corticosteroid therapy<sup>§</sup>
5. Administration of any other investigational drug within 30 days of the screening visit

---

### Concurrent diseases

1. Any of the following cardiovascular diseases within 6 months of the screening visit:
  - a) Myocardial infarction
  - b) Cardiac surgery or revascularization (coronary artery bypass surgery/percutaneous transluminal coronary angioplasty)
  - c) Unstable angina
  - d) Unstable CHF
  - e) NYHA CHF Class III or IV
  - f) Transient ischemic attack or significant cerebrovascular disease
  - g) Unstable or previously undiagnosed arrhythmia
2. History of
  - a) Unstable or rapidly progressing renal disease, conditions of congenital renal glucosuria, or renal allograft
  - b) Hemoglobinopathy with the exception of sickle cell trait, thalassemia minor, chronic, or recurrent hemolysis

## SUPPLEMENTARY DATA

- c) Bladder cancer
- d) Radiation therapy to the lower abdomen or pelvis at any time
- 3. Significant hepatic disease, including but not limited to chronic active hepatitis and/or severe hepatic insufficiency
- 4. Malignancy within 5 years of the screening visit, with the exception of treated basal cell carcinoma or treated squamous cell carcinoma
- 5. Known immunocompromised status, including but not limited to individuals who have undergone organ transplantation or are HIV positive
- 6. Donation of blood or blood products to a blood bank, blood transfusion, or participation in a clinical study requiring the withdrawal of >400 mL of blood during the 8 weeks prior to the screening visit

---

### Laboratory findings

- 1. The following laboratory findings:
  - a) Aspartate aminotransferase >3× ULN normal
  - b) Alanine aminotransferase >3× ULN
  - c) Serum total bilirubin >2× ULN, unless exclusively caused by Gilbert's Syndrome
  - d) Calculated creatinine clearance <60 mL/min
  - e) Hemoglobin ≤11.0 g/dL (110 g/L) for men and ≤10.0 g/dL (100 g/L) for women
  - f) Positive for hepatitis B surface antigen or anti-hepatitis C virus antibody
  - g) Abnormal Free T4

---

### Other

- 1. Allergies or contraindication to the contents of dapagliflozin tablets or insulin
- 2. Women who are pregnant or breastfeeding
- 3. Prisoners or patients involuntarily incarcerated or detained, including for treatment of psychiatric or physical illness
- 4. Patients undergoing a commercial weight loss program with ongoing weight loss, or on an intensive exercise programme
- 5. Any unstable endocrine, psychiatric, or rheumatic disorders as judged by the Investigator

## SUPPLEMENTARY DATA

6. Patients at risk of volume depletion due to co-existing conditions or concomitant medications, such as loop diuretics, who could not carefully monitor their volume status

---

\*as measured by the central laboratory; one-time repeat HbA1c test for patients in screening was allowed if their initial test result was  $\pm 0.2\%$  of the cut-off values).

†Minimum sensitivity 25 IU/L or equivalent HCG units.

‡Defined as more than one episode requiring medical assistance, emergency care (paramedics or emergency room care), and/or glucagon therapy administered by a third-party individual within 1 month prior to the screening visit.

§Defined as any dose of systemic corticosteroid (including local injections such as intramuscular or intra-articular etc.) taken for >4 weeks within 3 months prior to the Day-1 visit; topical or inhaled corticosteroids were allowed.

BMI, body mass index; CHF, congestive heart failure; CGM, continuous glucose monitoring; CSII, continuous subcutaneous insulin infusion; DKA, diabetic ketoacidosis; GLP-1, glucagon-like peptide-1; HbA1c, glycated hemoglobin; HIV, human immunodeficiency virus; MDI, multiple daily injections; NYHA, New York Heart Association; SD, standard deviation; SGLT2, sodium-glucose cotransporter type 2; ULN, upper limit of normal.

**Supplementary Table 2. Additional details about study methodology**

---

**Diabetes management**

4. Diabetes management included glycemic control and monitoring glycemic variability and frequency of hypoglycemic events.
5. Patients were provided counselling for diet and exercise throughout the lead-in and treatment periods

**Randomization stratification**

Randomization was stratified on the following basis:

6. Current use of continuous glucose monitoring
7. Method of insulin administration: MDI versus CSII
8. Baseline (Week -1) HbA1c (7.5–<9.0% versus 9.0–10.5% [58–<75 mmol/mol versus 75–91 mmol/mol])

**Visit schedule**

- g) During the lead-in period, visits were scheduled at Weeks -8, -4, -2, and -1 (Week -4 could be an optional phone visit)
- h) During the study period, visits occurred on Day 1 and at Weeks 1, 2, 4, 8, 10, 12, 18, 22, and 24 (Weeks 2, 10 and 22 could be optional phone visits)
- i) Telephone visits occurred on Days 2, 4, and 10
- j) HbA1c was recorded at Weeks 4, 8, 12, 18, and 24; total daily insulin dose at Weeks 2, 12, and 24; and body weight on Day 1 and at Weeks 1, 2, 4, 8, 12, 18, and 24

**Insulin dose adjustment**

- h) Insulin doses were adjusted as deemed appropriate by the investigator, based on CGM or SMBG readings (recommended 4 times/day at a minimum and 6 times/day during protocol specified periods of intense glucose monitoring), local guidance, and individual circumstances
- i) In patients on CGM, sensor data were used for to make insulin dose adjustments

**Change in Insulin administration method**

- h) Patients were not allowed to change their insulin administration method (MDI or CSII) during the study unless a patient needed to replace an insulin pump

## SUPPLEMENTARY DATA

- i) In such cases, a temporary switch (<2 weeks) to MDI was allowed, with CSII administration restarting as soon as possible

### **Brief instructions for use of blood ketone meters**

- e) Patients were trained in the procedure of conducting blood ketone testing according to the manufacturer's specifications
- f) Patients were advised to measure their blood ketones on experiencing potential symptoms/signs of DKA, including but not limited to: excessive thirst, nausea and vomiting, frequent urination, weakness or fatigue, fever, fruity-scented breath, confusion, and/or consistently elevated blood glucose, and/or during acute illness
- g) Ketone measurement should be done if symptoms occur, regardless of plasma glucose values
- h) Blood ketone test results, symptoms potentially associated with DKA, and relevant risk factors (eg, missed insulin injection, insulin pump malfunction, infection, heart attack, etc) should be recorded

### **CGM assessments**

- Sample collection was done for BL (Weeks -2 to -1), Weeks 10 to 12, and Weeks 22 to 24
- The electronic CGM sensor measured the patient's interstitial glucose level using electrodes to measure an electric signal produced by glucose oxidase reaction, recoding data approximately every 5 minutes
- The CGM sensor was inserted subcutaneously at Weeks -2 and -1 visits and removed prior to the first dose on the Day 1 visit, and at Weeks 10 and 22 visits to allow for monitoring of a 2 week time period
- During these periods, patients were required to document their three main meal times in the diary every day

---

CGM, continuous glucose monitoring; CSII, continuous subcutaneous insulin infusion; DKA, diabetic ketoacidosis; MDI, multiple daily injections;

SUPPLEMENTARY DATA

**Supplementary Table 3. Sensitivity analysis using multiple imputation for patients discontinuing treatment early**

|                                            | <b>Dapagliflozin 5<br/>mg + Insulin<br/>(n=273)</b> | <b>Dapagliflozin<br/>10 mg +<br/>Insulin<br/>(n=270)</b> | <b>Placebo +<br/>Insulin<br/>(n=272)</b> |
|--------------------------------------------|-----------------------------------------------------|----------------------------------------------------------|------------------------------------------|
| Adjusted mean change from<br>baseline (SE) | -0.28 (0.06)                                        | -0.34 (0.05)                                             | 0.04 (0.06)                              |
| Difference from placebo (95% CI)           | -0.32<br>(-0.45, -0.19)                             | -0.39<br>(-0.52, -0.25)                                  |                                          |
| p-value*                                   | <0.0001                                             | <0.0001                                                  |                                          |

All data before the start of long-term dose are included. Analysis is based on an ANCOVA model with treatment group as an effect, and stratum and baseline values as covariates. Analysis is repeated on 1000 imputed datasets, and results combined using Rubin's formula. For patients who discontinued treatment early and did not have HbA1c measurements at Week 24, their Week 24 HbA1c values are imputed based on the data from those retrieved patients in the same treatment group, i.e. those who discontinued treatment early but had HbA1c measurements at Week 24, using a multiple imputation approach. \*Nominal p-value.



SUPPLEMENTARY DATA

**Supplementary Table 4. Change in HbA1c (%) from baseline to Week 24 (evaluation in subgroups by use of personal CGM)**

| Subgroup statistics                           | Dapagliflozin<br>5 mg + Insulin<br>(n=271) | Dapagliflozin<br>10 mg +<br>Insulin<br>(n=270) | Placebo +<br>Insulin<br>(n=272) |
|-----------------------------------------------|--------------------------------------------|------------------------------------------------|---------------------------------|
| For patients using personal CGM               |                                            |                                                |                                 |
| n*                                            | 87                                         | 85                                             | 83                              |
| n†                                            | 82                                         | 80                                             | 74                              |
| Baseline mean (SD)                            | 8.41 (0.66)                                | 8.30 (0.66)                                    | 8.32 (0.62)                     |
| Week 24 mean (SD)                             | 8.07 (0.81)                                | 7.95 (0.76)                                    | 8.25 (0.85)                     |
| Adjusted mean change from baseline<br>(SE)    | -0.34 (0.07)                               | -0.34 (0.07)                                   | -0.11<br>(0.08)                 |
| Difference from placebo (95% CI)              | - 0.23<br>(-0.43, -0.03)                   | -0.23<br>(-0.44, -0.03)                        |                                 |
| For patients not using personal CGM           |                                            |                                                |                                 |
| n*                                            | 179                                        | 182                                            | 184                             |
| n†                                            | 163                                        | 165                                            | 165                             |
| Baseline mean (SD)                            | 8.46 (0.71)                                | 8.47 (0.69)                                    | 8.46 (0.64)                     |
| Week 24 mean (SD)                             | 8.10 (0.86)                                | 8.01 (0.76)                                    | 8.52 (0.85)                     |
| Adjusted mean change from baseline<br>(SE)    | -0.34 (0.05)                               | -0.40 (0.05)                                   | -0.10<br>(0.05)                 |
| Difference from placebo (95% CI)              | - 0.44<br>(-0.58, -0.30)                   | -0.50<br>(-0.64, -0.36)                        |                                 |
| Use of CGM interaction test p-value‡ = 0.0269 |                                            |                                                |                                 |

\*Number of patients in full analysis dataset with non-missing baseline and at least one post-baseline value. †Number of patients in full analysis dataset with non-missing baseline and Week 24 values. P-value for the treatment-by-subgroup interaction based on average treatment effect vs. control across subgroups at Week 24.

CGM, continuous glucose monitoring, CI, confidence intervals; SD, standard deviation; SE, standard error

SUPPLEMENTARY DATA

**Supplementary Table 5. Change in HbA1c (%) from baseline to Week 24 (evaluation in subgroups by method of insulin administration)**

| Subgroup statistics                        | Dapagliflozin<br>5 mg + Insulin<br>(n=271) | Dapagliflozin<br>10 mg +<br>Insulin<br>(n=270) | Placebo +<br>Insulin<br>(n=272) |
|--------------------------------------------|--------------------------------------------|------------------------------------------------|---------------------------------|
| <b>CSII</b>                                |                                            |                                                |                                 |
| n*                                         | 90                                         | 92                                             | 91                              |
| n†                                         | 82                                         | 86                                             | 76                              |
| Baseline mean (SD)                         | 8.38 (0.66)                                | 8.40 (0.61)                                    | 8.38 (0.65)                     |
| Week 24 mean (SD)                          | 8.00 (0.71)                                | 8.04 (0.82)                                    | 8.29 (0.87)                     |
| Adjusted mean change from baseline<br>(SE) | -0.35 (0.07)                               | -0.35 (0.07)                                   | -0.06<br>(0.07)                 |
| Difference from placebo (95% CI)           | - 0.28<br>(-0.48, -0.09)                   | -0.29<br>(-0.48, -0.09)                        |                                 |
| <b>MDI</b>                                 |                                            |                                                |                                 |
| n*                                         | 176                                        | 175                                            | 176                             |
| n†                                         | 163                                        | 159                                            | 163                             |
| Baseline mean (SD)                         | 8.48 (0.71)                                | 8.43 (0.73)                                    | 8.43 (0.63)                     |
| Week 24 mean (SD)                          | 8.14 (0.90)                                | 7.96 (0.73)                                    | 8.50 (0.85)                     |
| Adjusted mean change from baseline<br>(SE) | -0.31 (0.05)                               | -0.39(0.05)                                    | 0.10 (0.05)                     |
| Difference from placebo (95% CI)           | - 0.41<br>(-0.55, -0.28)                   | -0.49<br>(-0.63, -0.35)                        |                                 |

Use of CGM interaction test p-value‡ = 0.1209

\*Number of patients in full analysis dataset with non-missing baseline and at least one post-baseline value. †Number of patients in full analysis dataset with non-missing baseline and Week 24 values. P-value for the treatment-by-subgroup interaction based on average treatment effect vs. control across subgroups at Week 24.

CGM, continuous glucose monitoring, CI, confidence intervals; SD, standard deviation; SE, standard error

**Supplementary Table 6. Change in CGM mean glucose values and MAGE**

|                                                              | <b>Dapagliflozin 5<br/>mg + Insulin<br/>(n=271)</b> | <b>Dapagliflozin<br/>10 mg +<br/>Insulin<br/>(n=270)</b> | <b>Placebo +<br/>Insulin<br/>(n=272)</b> |
|--------------------------------------------------------------|-----------------------------------------------------|----------------------------------------------------------|------------------------------------------|
| <b>24-h CGM mean value (mg/dL)</b>                           |                                                     |                                                          |                                          |
| N*                                                           | 252                                                 | 255                                                      | 257                                      |
| Baseline mean (SD)                                           | 192.67 (28.68)                                      | 191.53 (28.09)                                           | 190.89<br>(28.95)                        |
| Week 24 mean (SD)                                            | 181.49 (32.93)                                      | 176.01 (26.52)                                           | 195.73<br>(31.04)                        |
| Adjusted mean change from<br>baseline (SE)                   | -6.46 (1.83)                                        | -10.54 (1.83)                                            | 9.20 (1.85)                              |
| Difference from placebo (95% CI)                             | -15.66<br>(-20.26, -11.05)                          | -19.74<br>(-24.34, -<br>15.14)                           |                                          |
| p-value <sup>†</sup>                                         | <0.0001                                             | <0.0001                                                  |                                          |
| <b>24-h CGM MAGE (mg/dL)</b>                                 |                                                     |                                                          |                                          |
| N*                                                           | 252                                                 | 255                                                      | 257                                      |
| Baseline mean (SD)                                           | 169.35 (29.60)                                      | 171.02 (29.85)                                           | 168.38<br>(29.29)                        |
| Week 24 mean (SD)                                            | 156.98 (33.89)                                      | 158.17 (35.69)                                           | 165.82<br>(28.22)                        |
| Adjusted mean change from<br>baseline (SE)                   | -10.17 (1.90)                                       | -9.68 (1.91)                                             | -0.33 (1.93)                             |
| Difference from placebo (95% CI)                             | -9.85<br>(-14.66, -5.03)                            | -9.36<br>(-14.16, -4.55)                                 |                                          |
| p-value <sup>†</sup>                                         | <0.0001                                             | 0.0001                                                   |                                          |
| <b>24-h CGM values within &gt;70 mg/dL to ≤180 mg/dL (%)</b> |                                                     |                                                          |                                          |
| N*                                                           | 252                                                 | 255                                                      | 257                                      |
| Baseline mean (SD)                                           | 43.50 (12.43)                                       | 43.68 (11.83)                                            | 43.52 (12.55)                            |
| Week 24 mean (SD)                                            | 51.12 (14.15)                                       | 53.22 (13.39)                                            | 42.40 (13.23)                            |

SUPPLEMENTARY DATA

|                                             |                       |                        |              |
|---------------------------------------------|-----------------------|------------------------|--------------|
| Adjusted mean change from<br>baseline (SE)  | 5.92 (0.82)           | 7.60 (0.82)            | -3.10 (0.83) |
| Difference from placebo (95% CI)            | 9.02<br>(6.97, 11.06) | 10.70<br>(8.66, 12.74) |              |
| p-value <sup>†</sup>                        | <0.0001               | <0.0001                |              |
| <b>24-H CGM values within ≤70 mg/dL (%)</b> |                       |                        |              |
| N*                                          | 252                   | 255                    | 257          |
| Baseline mean (SD)                          | 4.76 (4.31)           | 5.12 (4.78)            | 5.24 (6.17)  |
| Week 24 mean (SD)                           | 4.77 (4.52)           | 5.19 (4.22)            | 4.47 (4.15)  |
| Adjusted mean change from<br>baseline (SE)  | -0.37 (0.28)          | -0.14 (0.28)           | -0.84 (0.28) |
| Difference from placebo (95% CI)            | 0.46<br>(-0.23, 1.16) | 0.70<br>(0.00, 1.39)   |              |
| p-value <sup>‡</sup>                        | NA                    | NA                     |              |

\*N is the number of subjects in full analysis dataset with non-missing baseline and at least one post-baseline value. <sup>†</sup>Nominal p-value. <sup>‡</sup>p-values were not calculated for exploratory endpoints such as this.

CI, confidence interval; CGM, continuous glucose monitoring; MAGE, mean amplitude of glucose excursion, NA, not available; SD, standard deviation; SE, standard error

**Supplementary Table 7. Summary of recurrent hypoglycemic events**

|                                                                                 | <b>Dapagliflozin 5<br/>mg + Insulin<br/>(n=271) (120.0<br/>patient-years)</b> | <b>Dapagliflozin 10<br/>mg + Insulin<br/>(n=270) (120.1<br/>patient-years)</b> | <b>Placebo +<br/>Insulin (n=272)<br/>(119.2 patient-<br/>years)</b> |
|---------------------------------------------------------------------------------|-------------------------------------------------------------------------------|--------------------------------------------------------------------------------|---------------------------------------------------------------------|
| Total number of hypoglycemic events                                             | 4725                                                                          | 4891                                                                           | 4579                                                                |
| Total number of patients experiencing ≥1 hypoglycemic event, <sup>a</sup> n (%) | 223 (82.3%)                                                                   | 231 (85.6%)                                                                    | 234 (86.0%)                                                         |
| Exposure adjusted incidence rate <sup>b</sup>                                   | 3935.97                                                                       | 4070.91                                                                        | 3842.40                                                             |
| <b>ADA categorization</b>                                                       |                                                                               |                                                                                |                                                                     |
| <b>Severe hypoglycemia</b>                                                      |                                                                               |                                                                                |                                                                     |
| Total number of event, <sup>c</sup> n (%)                                       | 58 (1.2%)                                                                     | 55 (1.1%)                                                                      | 51 (1.1%)                                                           |
| Total number of patients experiencing ≥1 hypoglycemic event, <sup>a</sup> n (%) | 17 (6.3%)                                                                     | 23 (8.5%)                                                                      | 21 (7.7%)                                                           |
| Exposure adjusted incidence rate <sup>b</sup>                                   | 48.31                                                                         | 45.78                                                                          | 42.80                                                               |
| <b>Documented symptomatic hypoglycemia</b>                                      |                                                                               |                                                                                |                                                                     |
| Total number of event, <sup>c</sup> n (%)                                       | 3550 (75.1%)                                                                  | 3769 (77.1%)                                                                   | 3526 (77.0%)                                                        |
| Total number of patients experiencing ≥1 hypoglycemic event, <sup>a</sup> n (%) | 216 (79.7%)                                                                   | 214 (79.3%)                                                                    | 222 (81.6%)                                                         |
| Exposure adjusted incidence rate <sup>b</sup>                                   | 2957.19                                                                       | 3137.04                                                                        | 2958.79                                                             |
| <b>Asymptomatic hypoglycemia</b>                                                |                                                                               |                                                                                |                                                                     |
| Total number of event, <sup>c</sup> n (%)                                       | 920 (19.5%)                                                                   | 959 (19.6%)                                                                    | 858 (18.7%)                                                         |

SUPPLEMENTARY DATA

|                                                                                       |             |             |            |
|---------------------------------------------------------------------------------------|-------------|-------------|------------|
| Total number of patients experiencing $\geq 1$ hypoglycemic event, <sup>a</sup> n (%) | 100 (36.9%) | 127 (47.0%) | 98 (36.0%) |
| Exposure adjusted incidence rate <sup>b</sup>                                         | 766.37      | 798.20      | 719.98     |

**Probable symptomatic hypoglycemia**

|                                                                                       |           |            |           |
|---------------------------------------------------------------------------------------|-----------|------------|-----------|
| Total number of event, <sup>c</sup> n (%)                                             | 65 (1.4%) | 57 (1.2%)  | 82 (1.8%) |
| Total number of patients experiencing $\geq 1$ hypoglycemic event, <sup>a</sup> n (%) | 20 (7.4%) | 29 (10.7%) | 27 (9.9%) |
| Exposure adjusted incidence rate <sup>b</sup>                                         | 54.15     | 47.44      | 68.81     |

**Relative hypoglycemia**

|                                                                                       |           |           |           |
|---------------------------------------------------------------------------------------|-----------|-----------|-----------|
| Total number of event, <sup>c</sup> n (%)                                             | 82 (1.7%) | 41 (0.8%) | 56 (1.2%) |
| Total number of patients experiencing $\geq 1$ hypoglycemic event, <sup>a</sup> n (%) | 19 (7.0%) | 17 (6.3%) | 20 (7.4%) |
| Exposure adjusted incidence rate <sup>b</sup>                                         | 68.31     | 34.13     | 46.99     |

**Other hypoglycemia**

|                                                                                       |           |           |          |
|---------------------------------------------------------------------------------------|-----------|-----------|----------|
| Total number of event, <sup>c</sup> n (%)                                             | 50 (1.1%) | 10 (0.2%) | 6 (0.1%) |
| Total number of patients experiencing $\geq 1$ hypoglycemic event, <sup>a</sup> n (%) | 6 (2.2%)  | 7 (2.6%)  | 5 (1.8%) |

## SUPPLEMENTARY DATA

(%)

|                             |       |      |      |
|-----------------------------|-------|------|------|
| Exposure adjusted           | 41.65 | 8.32 | 5.03 |
| incidence rate <sup>b</sup> |       |      |      |

---

Includes hypoglycemia events with onset on or after the first date/time of double-blind treatment and on or prior to the last day of short-term double-blind treatment plus 4 days or up to the start of the long-term if earlier. <sup>a</sup>Percentages are based on the total number of subjects in safety analysis set; <sup>b</sup>Exposure adjusted incidence rate per 100 person-years including recurrences; <sup>c</sup>Percentages are based on the total number of events.

ADA, American Diabetes Association

SUPPLEMENTARY DATA

**Supplementary Table 8. Number of self-monitored blood ketone measurements**

|                                                                                  | Dapagliflozin<br>5 mg + Insulin<br>(n=271) | Dapagliflozin<br>10 mg +<br>Insulin<br>(n=270) | Placebo +<br>Insulin<br>(n=272) |
|----------------------------------------------------------------------------------|--------------------------------------------|------------------------------------------------|---------------------------------|
| n*                                                                               | 197                                        | 186                                            | 193                             |
| Number of self-monitored blood ketone measurements                               | 2993                                       | 3529                                           | 4373                            |
| Number of self-monitored blood ketone measurements >3.0 mmol/L                   | 18                                         | 21                                             | 7                               |
| Mean number of self-monitored blood ketone measurements per day per patient (SD) | 1.21 (0.70)                                | 1.17 (0.53)                                    | 1.23 (0.63)                     |

n\* is the number of subjects in safety analysis set with at least one ketones assessment during short-term double-blind treatment period.

SD, standard deviation

**Supplementary Table 9. Listing of maximum ketone values for patients with definite DKA events**

| Patient No | Treatment        | Maximum BOHB value (mmol/L) | Number of ketone measurements prior to or on the same day as the event |
|------------|------------------|-----------------------------|------------------------------------------------------------------------|
| 1          | DAPA 5 mg + INS  | 5.8                         | 4                                                                      |
| 2          | DAPA 5 mg + INS  | 4.3                         | 1                                                                      |
| 3          | DAPA 5 mg + INS  | 6.3                         | 5                                                                      |
| 4          | DAPA 5 mg + INS  | 4.6                         | 9                                                                      |
| 5          | DAPA 5 mg + INS  | 2.9                         | 5                                                                      |
| 6          | DAPA 5 mg + INS  | NA                          | 13                                                                     |
| 7          | DAPA 5 mg + INS  | NA                          | 0                                                                      |
| 8          | DAPA 10 mg + INS | 5.0                         | 1                                                                      |
| 9          | DAPA 10 mg + INS | 2.2                         | 3                                                                      |
| 10         | DAPA 10 mg + INS | 7.2                         | 2                                                                      |
| 11         | DAPA 10 mg + INS | NA                          | 0                                                                      |
| 12         | DAPA 10 mg + INS | NA                          | 0                                                                      |
| 13         | DAPA 10 mg + INS | NA                          | 0                                                                      |

BOHB, beta-hydroxybutyrate, DKA, diabetic ketoacidosis; DAPA, dapagliflozin; INS, insulin; NA, not available



SUPPLEMENTARY DATA

Supplementary Figure 1. Absolute mean (SD) HbA1c (%) over 24 weeks

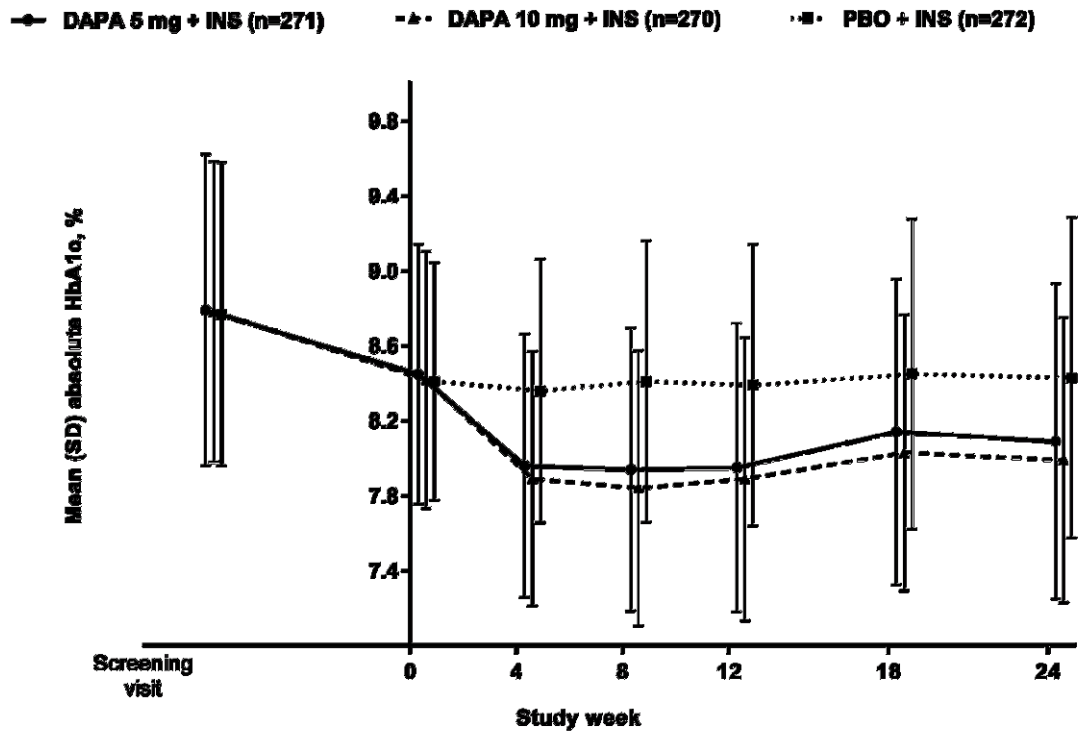

**Patients per timepoint**

|                         |            |            |            |            |            |            |            |
|-------------------------|------------|------------|------------|------------|------------|------------|------------|
| <b>DAPA 5 mg + INS</b>  | <b>271</b> | <b>266</b> | <b>265</b> | <b>258</b> | <b>253</b> | <b>250</b> | <b>245</b> |
| <b>DAPA 10 mg + INS</b> | <b>269</b> | <b>267</b> | <b>264</b> | <b>261</b> | <b>257</b> | <b>246</b> | <b>245</b> |
| <b>PBO + INS</b>        | <b>270</b> | <b>267</b> | <b>265</b> | <b>260</b> | <b>258</b> | <b>246</b> | <b>239</b> |

## SUPPLEMENTARY DATA

### Supplementary Appendix. List of DEPICT-2 Principal Investigators

#### Argentina:

**Cecilia Luquez**, Centro Medico Luquez, Cordoba, Argentina; **Federico Perez Manghi**, Centro De Investigaciones Metabolicas (Cinme), Ciudad Autónoma De Buenos Aires, Argentina; **Maria Rosa Ulla**, ILAIM, Instituto Latinoamericano de Investigaciones Medicas, Codoba, Argentina; **Maria Alejandra Moisello**, Instituto Medico Especializado (IME), Ciudad Autonoma de Buenos, Argentina; **Virginia Visco**, DIM Clinica Privada, Ramos Mejia, Buenos Aires, Argentina; **Silvia Gorban De Lapertoza**, Centro Universitario De Investigacion En Farmacologia Clinica - CUIFC - Universidad Nacional Del Nordeste, Corrientes, Argentina; **Silvana Ernestina Solis**, Centro Diabetologico Córdoba Dr. Waitman, Cordoba, Argentina; **Javier Farias**, Sanatorio Guemes, Buenos Aires, Argentina; **Georgina Sposetti**, Instituto de Investigaciones Clinicas (IIC) Mar del Plata, Buenos Aires, Argentina.

#### Belgium:

**Pieter Gillard**, Universitaire Ziekenhuizen Leuven – Campus Gasthuisberg, Herestraat, Leuven, Belgium; **Pascale Abrams**, Sint-Vincentius ziekenhuis, Antwerpen, Belgium; **Marina van Ypersele de Strihou**, Cliniques De L'Europe- Sainte-Elisabeth, Brussels, Belgium.

#### Canada:

**James Conway**, Canadian Centre for Research on Diabetes, Smiths Falls, Ontario, Canada; **Sue Pedersen**, C-ENDO Diabetes and Endocrinology Clinic, Calgary, Alberta, Canada; **Peter Senior**, Alberta Diabetes Institute - University of Alberta, Edmonton, Alberta, Canada; **Joanne F Liutkus**, Joanne F. Liutkus, Medicine Professional Corporation, Cambridge, Ontario, Canada; **Churn-Ern Yip**, Nova Scotia Health Authority, Halifax, Nova Scotia, Canada; **Zubin Punthakee**, McMaster University, Hamilton, Ontario, Canada; **Frederic Bernier**, Centre Hospitalier Universitaire de Sherbrooke(CHUS), Sherbooke, Quebec, Canada; **Heather Lochnan**, The Ottawa Hospital - Riverside Campus, University Of Ottawa, Ottawa, Ontario, Canada; **Vincent Woo**, Winnipeg Regional Health Authority, Health Sciences Centre Winnipeg, Winnipeg, Manitoba, Canada; **Thomas Elliott**, BC Diabetes, Vancouver, British Columbia, Canada.

#### Chile:

**Juan Palma**, Hospital y CRS El Pino, San Bernardo, Santiago, Chile; **Carmen Solis Merino**, Investigacion y Terapias reumatologicas innovadoras Ltda, Providencia,,Santiago, Chile; **Alfredo Danin Vargas**, Centro de Investigacion Clinica del Sur, Temuco, Region de la Araucan, Chile.

#### Germany:

**Ulrich Wendisch**, Gemeinschaftspraxis fuer Innere Medizin und Diabetologie, Hamburg, Germany; **Andreas Reichel**, Universitätsklinikum Dresden, Dresden, Germany; **Jochen Seufert**, Universitaetsklinikum Freiburg, Freiburg, Germany; **Bernd Becker**, Praxis Am Markt

## SUPPLEMENTARY DATA

(Dr. Becker), Nordrhein-Westfalen, Germany; **Hasan Alawi**, Diabetes Zentrum Saarlouis Diabetologische Praxis, Saarlouis, Germany; **Andreas L Birkenfeld**, GWT-TUD GmbH, Studienzentrum Professor Hanefel, Dresden, Germany; **Christoph Hasslacher**, Diabetesinstitut Am St. Josefskrankenhaus, Heidelberg, Germany; **Joerg Luedemann**, Schwerpunktpraxis Dr. Luedemann fuer Diabetes Gefaess- und Ernaehrungsmedizin, Falkensee, Germany; **Thomas Schaum**, Sana Kliniken Ostholstein GmbH, Schleswig-Holstein, Germany; **Cornelia Marck**, Gemeinschaftspraxis Marck Marck Linn Pickel, Pohlheim, Germany; **Joachim Sauter**, Office of Dr. Joachim Sauter MD, Wangen, Germany; **Ulrich Aigner**, Versdias GmbH, Zentrum Für Klinische Studien, Sulzbach-Rosenberg, Germany.

### Japan:

**Yukiko Onishi**, 2-2-6 Nihombashibakuro-cho, Chuo-ku, Tokyo-To, Japan; **Hiroaki Seino**, 6-192-2 Kaisei, Koriyama-shi, Fukushima-Ken, Japan; **Yuichi Sato**, 422 Tsubukuhon-machi, Kurume-shi, Fukuoka-Ken, Japan; **Kiyohide Nunoi**, 422 Tsubukuhon-machi, Kurume-shi, Fukuoka-Ken, Japan; **Akira Yamauchi**, 9-23 Shimizu-ku Shofuku-cho, Shizuoka-shi, Shizuoka-Ken, Japan; **Eitaro Nakashima**, 1-10-6 Minato-ku Komei, Nagoya-shi, Aichi-Ken, Japan; **Hiroki Ikeda**, 1-18-5 Tsukaguchi-cho, Amagasaki-shi, Hyogo-Ken, Japan; **Toshihiko Shiraiwa**, 4-10-24 Hozenji, Kashiwara-shi, Osaka-Fu, Japan; **Yoshimitsu Yamasaki**, 3-3-45 Kitaku Umeda, Osaka-shi, Osaka-Fu, Japan; **Hiroki Yokoyama**, 6-4-3 Nishi 6jo Minami, Obihiro-shi, Hokkaido, Japan; **Kunihiko Nakamura**, 1-17-22 Fuchu-cho Osu, Aki-gun, Hiroshima-Ken, Japan; **Masayuki Noritake**, 5-3-2 Hitachinohigashi, Ushiku-shi, Ibaraki-Ken, Japan; **Shozo Miyauchi**, 1-1 Goten-machi, Uwajima-shi, Ehime-Ken, Japan; **Tomomi Hakoda**, 1844 Daimoncho Tsunoshita, Fukuyamashi, Hiroshima-Ken, Japan; **Yoshihide Hirohata**, 2-19-15 Yahatanishi-ku Hokuchiku, Kitakyushu-shi, Fukuoka-Ken, Japan; **Atsushi Hasegawa**, 1-5-3 Hokuyo, Chitose-shi, Hokkaido, Japan; **Yoshihide Fukumoto**, Omure 1-32-24, Ibusuki-shi, Kagoshima-Ken, Japan; **Hiroataka Nagashima**, 1-22-17 Hyakunin-cho, Shinjuku-ku, Tokyo-To, Japan; **Masahiro Takihata**, 1738-1, Kamimiyada, Minamishitaura-machi, Miura-shi, Kanagawa-Ken, Japan; **Tetsuro Kamada**, Horie-cho 17-1, Kagoshima-shi, Kagoshima-Ken, Japan; **Hideaki Jinnouchi**, 6-2-3 Kuhonji, Chuo-ku, Kumamoto-shi, Kumamoto-Ken, Japan; **Yuri Ono**, 3-3-27 Kita 1jo Nishi Chuo-ku, Sapporo-shi, Hokkaido, Japan; **Takayuki Watanabe**, 3-12-1 Shinyamashita, Naka-ku, Yokohamashi, Kanagawa-Ken, Japan; **Hiroshi Ohashi**, 1-32-1 Ekihigashidori, Oyama-shi, Tochigi-Ken, Japan; **Masahiko Takai**, 1-26-27 Ofuna, Kamakura-shi, Kanagawa-Ken, Japan; **Tadashi Seguchi**, 476 Bunyo, Oita-shi, Oita-Ken, Japan; **Katsuya Yamazaki**, 715-1 Higashihiratsuka, Tsukuba-shi, Ibaraki-Ken, Japan; **Hajime Maeda**, 4-1-4-102 Yokodai, Isogo-ku, Yokohama-shi, Kanagawa-Ken, Japan; **Shingo Iwasaki**, 1-2-8 Kosakahon-machi, Higashiosakashi, Osaka-Fu, Japan.

### Netherlands:

**H.W. De Valk**, Universitair Medisch Centrum (UMC) Utrecht - Locatie AZU, Utrecht, Netherlands; **Adriaan Kooy**, Bethesda Diabetes Research Center, Hoogeveen, Drenthe, Netherlands; **Sabine Landewe-Cleuren**, MUMC, Maastricht, Netherlands;

### Poland:

## SUPPLEMENTARY DATA

**Katarzyna Madziarska**, WroMedica S.C., Department of Medicine/Nephrology, Wroclaw, Poland; **Andrzej Stankiewicz**, Medyczne Centrum Diabetologiczno-Endokrynologiczno-Metaboliczne DIABENDO-MET Sp z o.o., Krakow, Poland; **Katarzyna Wasilewska**, Zdrowie Osteo-Medic s.c. Lidia I Artur Racewicz, Podlaskie, Poland; **Gottfried Rudolfsky**, Kantonsspital Olten, Solothurn, Poland; **Maciej Malecki**, Oddzial Kliniczny Chorob Metabolicznych Szpital Uniwersytecki w Krakowie, Krakow, Poland; **Ewa Pankowska**, Instytut Diabetologii Sp. z o.o., Warszawa, Poland; **Ewa Szyprowska**, CenterMed Lublin Sp.z o.o, Niepubliczny Zaklad Opieki Zdrowotnej, Lubelskie, Poland; **Monika Lukaszewicz**, Centrum Badan Klinicznych PI-House, Poradnia Diabetologiczna, Gdansk, Poland; **Lidia Tokarska**, Landa Specjalistyczne Gabinety Lekarskie, Krakow, Malopolskie, Poland.

### Russia:

**Irina Bondar**, Novosibirsk State Medical University of Ministry of Healthcare of the Russian Federation, Novosibirsk, Russia; **Irina Karpova**, City Diagnostic Consulting Center, Saint Petersburg Territorial Diabetic Center, St. Petersburg, Russia; **Ludmila Ruyatkina**, SBRIHPE, Novosibirsk State Medical University of MHSD, Novosibirsk, Russia; **Alsu Zalevskaya**, City hospital #2, St. Petersburg, Russia; **Ruslan Sardinov**, Outpatient clinic, 1 Russian Academy of Science, Universitetskaya, St. Petersburg, Russia; **Yury Khalimov**, Federal State Budgetary Institution Of Higher Professional Education – Northwestern State Medical University N.A.I.I.Mechnikov, St. Petersburg, Russia.

### Sweden:

**Folke Sjoberg**, Clinical Trials Consultants AB, Linkoping, Sweden; **Pekka Koskinen**, Pharmasite AB, Helsingborg, Scania, Sweden; **Dan Curiac**, CTC (Clinical Trial Center) Sahlgrenska University Hospital, Vastra Gotaland, Sweden; **Marcus Lind**, NU Hospital Group, Diabetes outpatient clinic, Uddevalla Hospital, Uddevalla, Sweden.

### Switzerland:

**Birgit Bach-Kliegel**, Diabetes Adipositas Zentrum Zuerich (DAZZ), Zollikerberg, Zuerich, Switzerland; **Bernd Schultes**, eSwiss Medical & Surgical Center, St Gallen, Switzerland.

### United Kingdom:

**Basil G Issa**, University Hospital Of South Manchester, Wythenshawe, Manchester, England, United Kingdom; **Anne Kilvert**, Northampton General Hospital (NGH) NHS Trust, Cliftonville, Northampton, England, United Kingdom; **Olivia Pereira**, Edna Coates Diabetes Centre-Pinderfields Hospital-MidYorkshire NHS Trust, Wakefield, England, United Kingdom; **Stephen Bain**, Swansea University, Swansea, Wales, United Kingdom; **Biswa Mishra**, The Royal Oldham Hospital, Oldham, Lancashire, England, United Kingdom; **Deepak Bhatnagar**, The Royal Oldham Hospital, Oldham, Lancashire, England, United Kingdom;

### United States of America:

**Leonard Chuck**, Diablo Clinical Research, Walnut Creek, California, USA; **David Gorson**, Office Of Dr. David Gorson Md, Bennington, Vermont, USA; **David Robertson**, Atlanta

## SUPPLEMENTARY DATA

Diabetes Associates, Georgia, USA; **Luis Casaubon**, Texas Diabetes & Endocrinology, Austin, Texas, USA; **Louis Chaykin**, Meridien Research, Bradenton, Florida, USA; **Juan Pablo Frias**, National Research Institute, Los Angeles, California, USA; **Stanley Hsia**, National Research Institute, Los Angeles, California, USA; **Robert Jenders**, National Research Institute, Los Angeles, California, USA; **Sam Lerman**, The Center for Diabetes and Endocrine Care, Fort Lauderdale, Florida, USA; **Scott Segel**, East Coast Institute for Research, LLC at Baker-Gilmour Cardiovascular Institute, Jacksonville, Florida, USA; **Peter Weissman**, Baptist Diabetes Associates, Miami, Florida, USA; **Anna Chang**, John Muir Physician Network, Concord, California, USA; **John Reed**, Endocrine Research Solutions, Inc., Roswell, Georgia, USA; **Ivy-Joan Madu**, Diabetes Associates Medical Group, Orange, California, USA; **Peter Bressler**, North Texas Endocrine Center, Dallas, Texas, USA; **Lisa Abbott**, Northern Nevada Endocrinology, Reno, Nevada, USA; **Sumana Gangi**, Southern Endocrinology Associates PA, Mesquite, Texas, USA; **Kate Wheeler**, Laureate Clinical Medical Group At Northside, Atlanta, Georgia, USA; **Kenneth Cohen**, New West Physicians, Golden, Colorado, USA; **William Biggs**, Amarillo Medical Specialists, Amarillo, Texas, USA; **Serge Jabbour**, Thomas Jefferson University Hospital, Philadelphia, Pennsylvania, USA; **Dennis Karounos**, Lexington VA Medical Center, Lexington, Kentucky, USA; **Sajeev Menon**, Kansas City Internal Medicine, Overland Park, Kansas, USA; **Wendell Miers**, Kentucky Diabetes And Endocrinology Center, Lexington, Kentucky, USA; **Grazia Aleppo**, Northwestern University, The Feinberg School Of Me, Chicago, Illinois, USA; **Gigi Lefebvre**, Meridien Research, Saint Petersburg, Florida, USA; **Danny Sugimoto**, Cedar Crosse Research Center, Chicago, Illinois, USA; **Robert Ferraro**, Southwest Endocrinology Associates, Albuquerque, New Mexico, USA; **Richard Kelly**, Precision Trials, Phoenix, Arizona, USA; **Marcel Twahirwa**, Doctors Hospital at Renaissance, Edinburg, Texas, USA; **Christopher Case**, Jefferson City Medical Group (JCMG) – JCMG Medical Building, Jefferson City, Missouri, USA; **Paul Norwood**, Valley Research, Fresno, California, USA; **David Klonoff**, Mills-Peninsula Health Services Diabetes Research Institute, San Mateo, California, USA; **Paul Denker**, Gulfcoast Endocrine and Diabetes Center, Clearwater, Florida, USA; **Priscilla Hollander**, Baylor Endocrine Center, Dallas, Texas, USA; **Michelle Welch**, Consano Clinical Research, Shavano Park, Texas, USA; **Matthew Leinung**, Albany Medical Center, Albany, New York, USA; **Larry Kotek**, Radiant Research Inc., Edina, Minnesota, USA; **Janet McGill**, Washington University School of Medicine, St. Louis, Missouri, USA; **Yshay Shlesinger**, NorCal Endocrinology and Internal Medicine, San Ramon, California, USA; **Cynthia Huffman**, Meridien Research, Tampa, Florida, USA; **Stephen Aronoff**, Research Institute of Dallas, Dallas, Texas, USA; **Daniel Lorber**, New York Hospital Queens, Flushing, New York, USA; **Antonio Terrelonge**, Ocean Blue Medical Research Center, Miami Springs, Florida, USA; **Firas Akhrass**, Endeavor Clinical Trials, Pa, San Antonio, Texas, USA; **Cindy Bredefeld**, Winthrop-University Hospital, Clinical Trials Center, Mineola, New York, USA; **Kenneth Hershon**, North Shore Diabetes and Endocrine Associates, New Hyde Park, New York, USA; **James Lenhard**, Christiana Care Health Services, Inc, Newark, Delaware, USA; **Daniel Donovan**, Mount Sinai School of Medicine, New York, New York, USA; **Larry Stonesifer**, Office of Dr. Larry D. Stonesifer, MD, Seattle, Washington, USA; **Craig Greenberg**, Western Michigan University School Of Medicine, Kalamazoo, Michigan, USA; **Eli Ipp**, Los Angeles Biomedical Research Institute at Harbor UCLA Medical Center, Torrance, California, USA; **Anuj Bhargava**, Iowa Diabetes and Endocrinology Research Center (IDERC), West Des Moines, Iowa, USA; **Shichun Bao**, Vanderbilt University Medical Center, Nashville, Tennessee, USA.
